# Supplementary material for: A deep sequencing approach to estimate Plasmodium falciparum complexity of infection (COI) and explore apical membrane antigen 1 diversity
Source: Springer Nature journal article supplement (doi:10.1186/s12936-017-2137-9), 2017-12-01

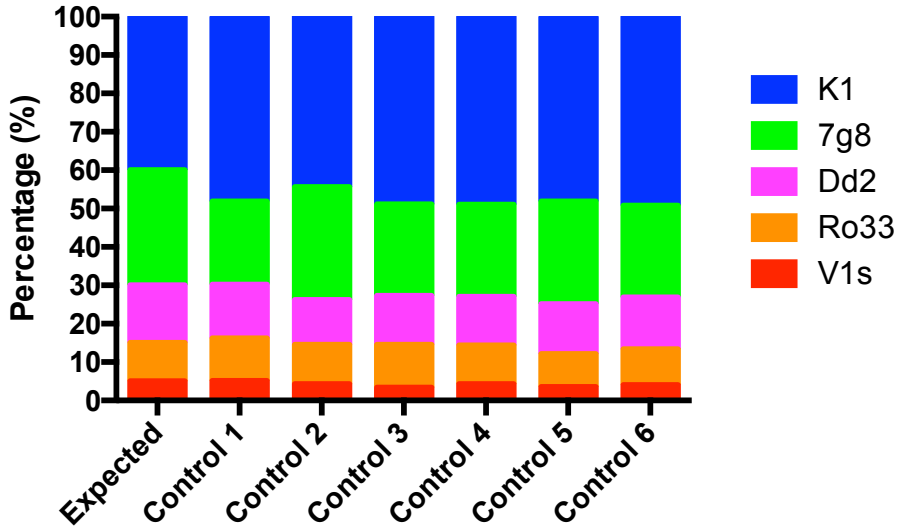

Supplement: MOESM4 [file 15311048]
